# Supplementary material for: Realization of a self-powered ZnO MSM UV photodetector with high responsivity using an asymmetric pair of Au electrodes
Source: Royal Society of Chemistry journal article supplement (doi:10.1039/c4tc01839g), 2014-01-01
Supplement: c4tc01839g1.pdf [file c4tc01839g1.pdf]

## Supporting information

### Realization of self-powered ZnO MSM UV photodetector with high responsivity using asymmetric pair of Au electrodes

Hong-Yu Chen,<sup>a,b,c</sup> Ke-Wei Liu,<sup>\*a</sup> Xing Chen,<sup>a</sup> Zhen-Zhong Zhang,<sup>a</sup> Ming-Ming Fan,<sup>a,b</sup> Ming-Ming Jiang,<sup>a</sup> Xiu-Hua Xie,<sup>a,b</sup> Hai-Feng Zhao,<sup>a</sup> and De-Zhen Shen<sup>\*a</sup>

<sup>a</sup> State Key Laboratory of Luminescence and Applications, Changchun Institute of Optics, Fine Mechanics and Physics, Chinese Academy of Sciences, Changchun, 130033, People's Republic of China

<sup>b</sup> Graduate University of the Chinese Academy of Sciences, Beijing, 100049, People's Republic of China

<sup>c</sup> Department of Materials Science, Fudan University, Shanghai, 200433, People's Republic of China

E-mail: [Liukw@ciomp.ac.cn](mailto:Liukw@ciomp.ac.cn) ; [Shendz@ciomp.ac.cn](mailto:Shendz@ciomp.ac.cn)

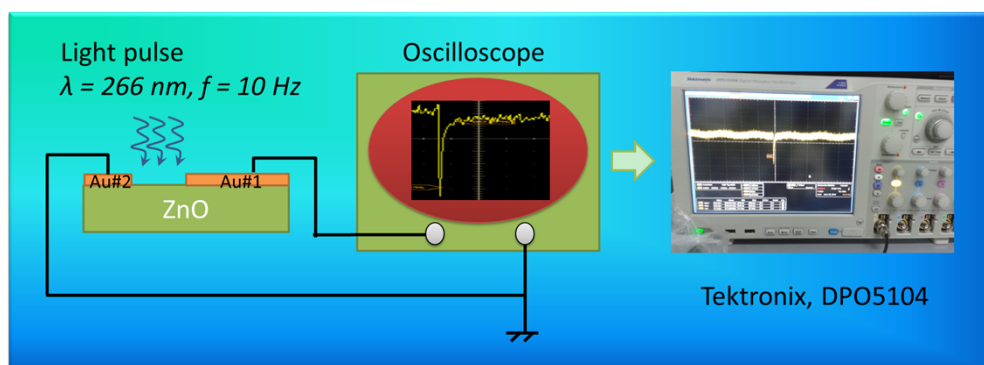

Fig. S1 Schematic experimental setup for the measurement of the temporal photoresponse.

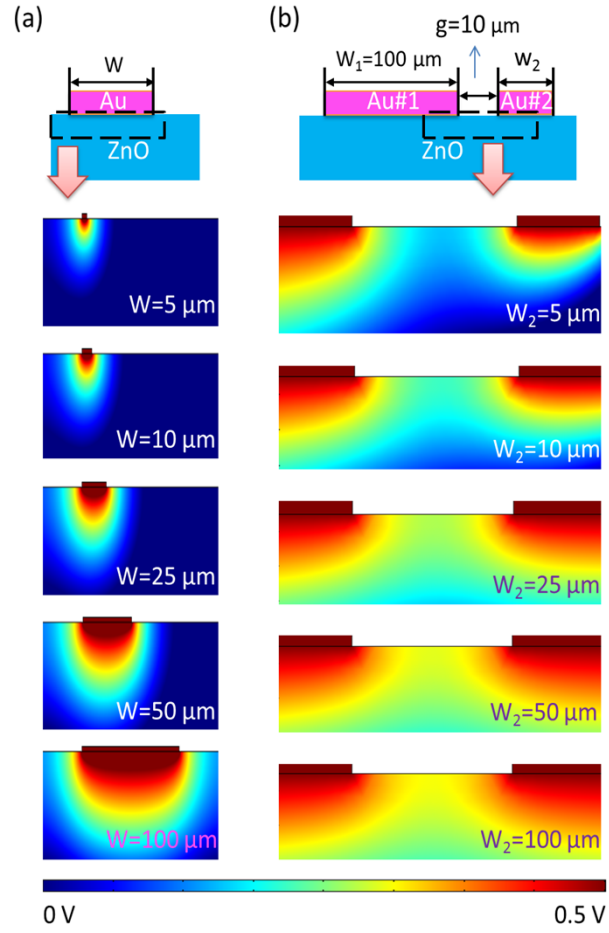

Fig. S2 Simulation of the potential distribution in ZnO film. (a)  $w=5-100 \mu\text{m}$ , (b)

$w_1=100 \mu\text{m}$ ,  $w_2=5-100 \mu\text{m}$ ,  $g=10 \mu\text{m}$ .

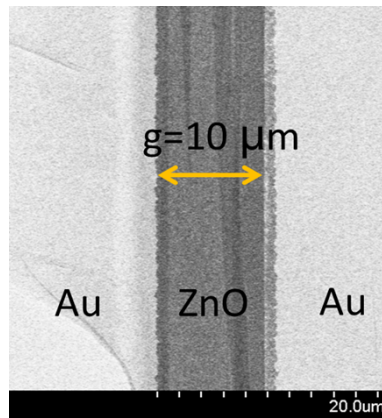

Fig. S3 SEM image of the Au#1-ZnO-Au#2 self-powered detector ( $w_1=w_2=100\text{ }\mu\text{m}$ ,  $g=10\text{ }\mu\text{m}$ ).
